# Supplementary material for: Effectiveness of Positive Deviance, an Asset-Based Behavior Change Approach, to Improve Knowledge, Attitudes, and Practices Regarding Dengue in Low-Income Communities (Slums) of Islamabad, Pakistan: A Mixed-Method Study
Source: MDPI journal article supplement (doi:10.3390/insects13010071), 2022-01-08
Supplement: s1 [file s1]

## Supplementary file

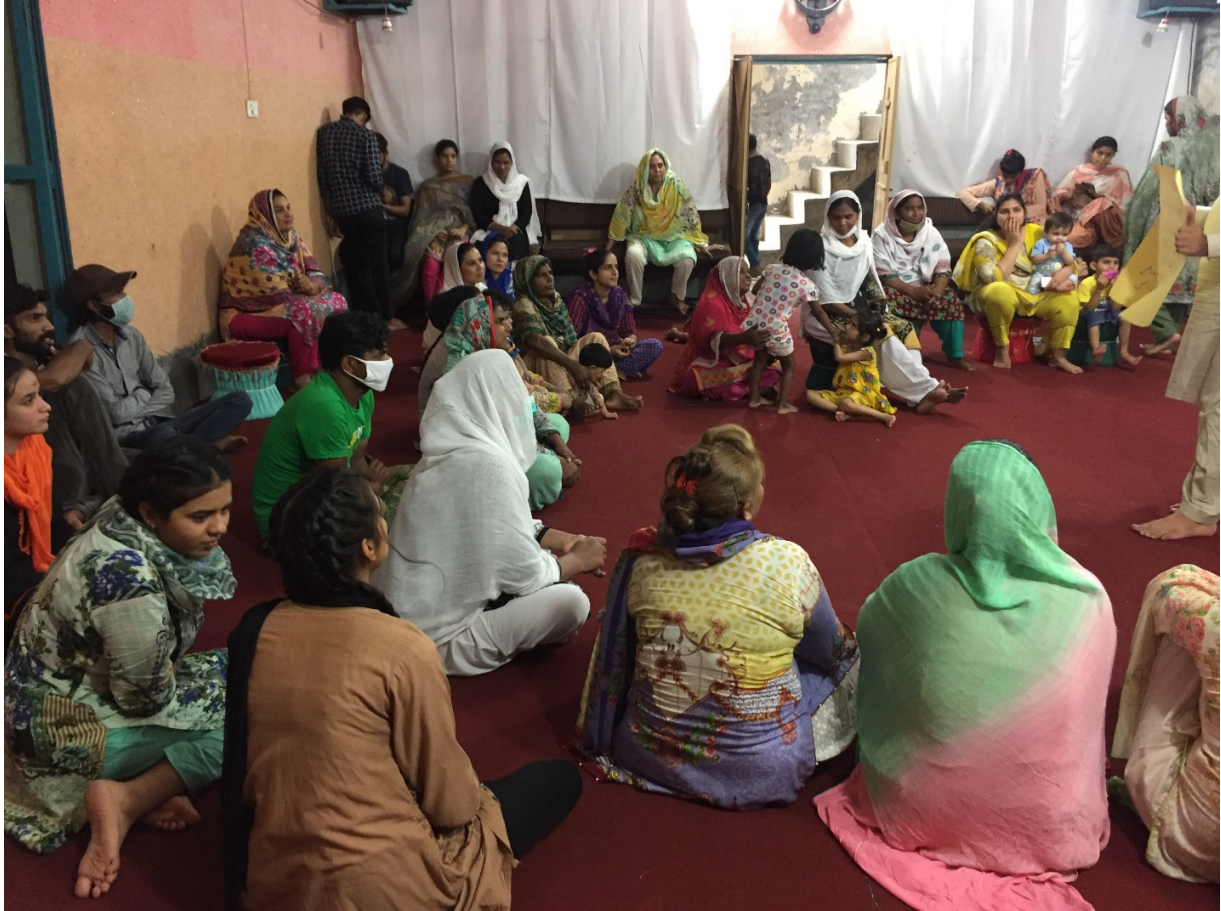

**Figure S1.** Community sensitization meeting with key community stakeholders.

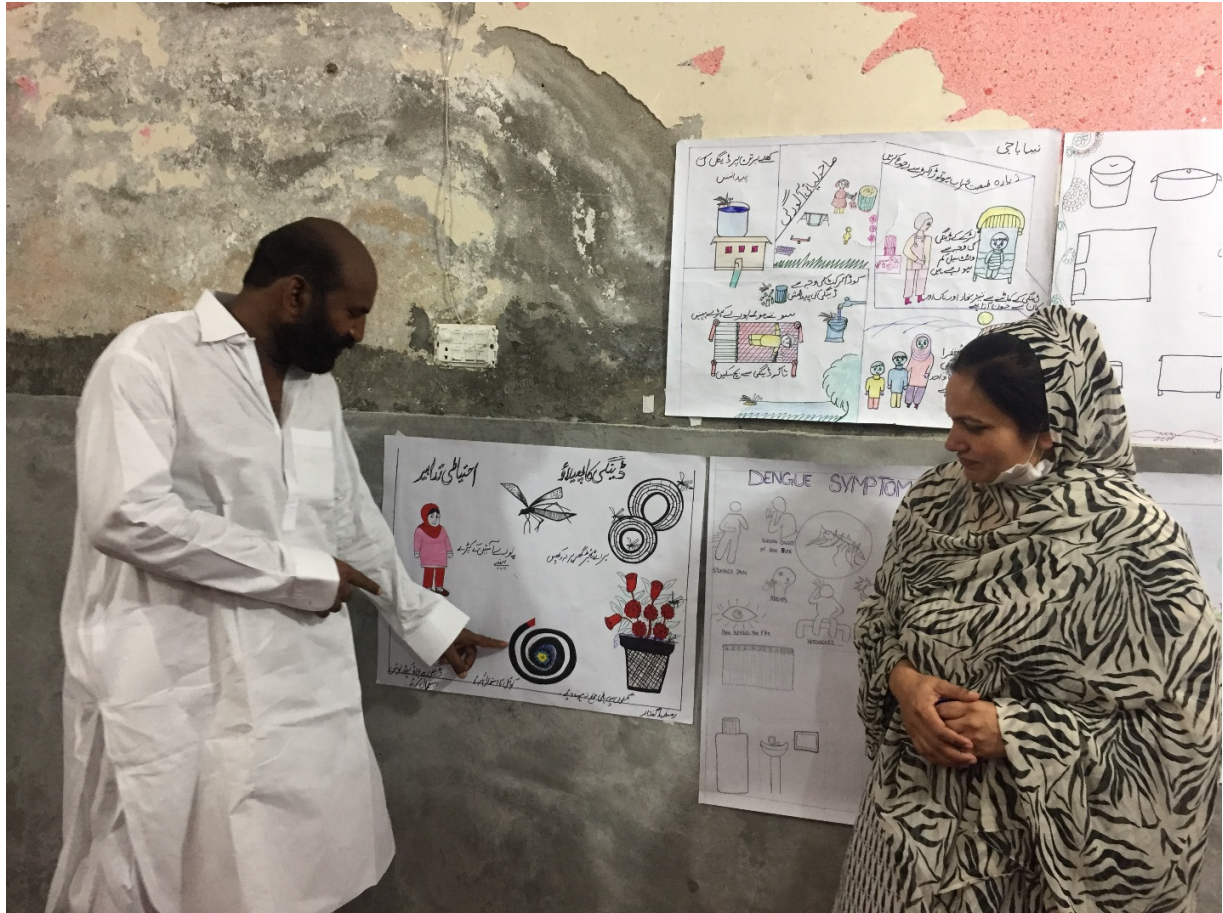

**Figure S2.** PD role models share their positive behaviors during the feedback session.



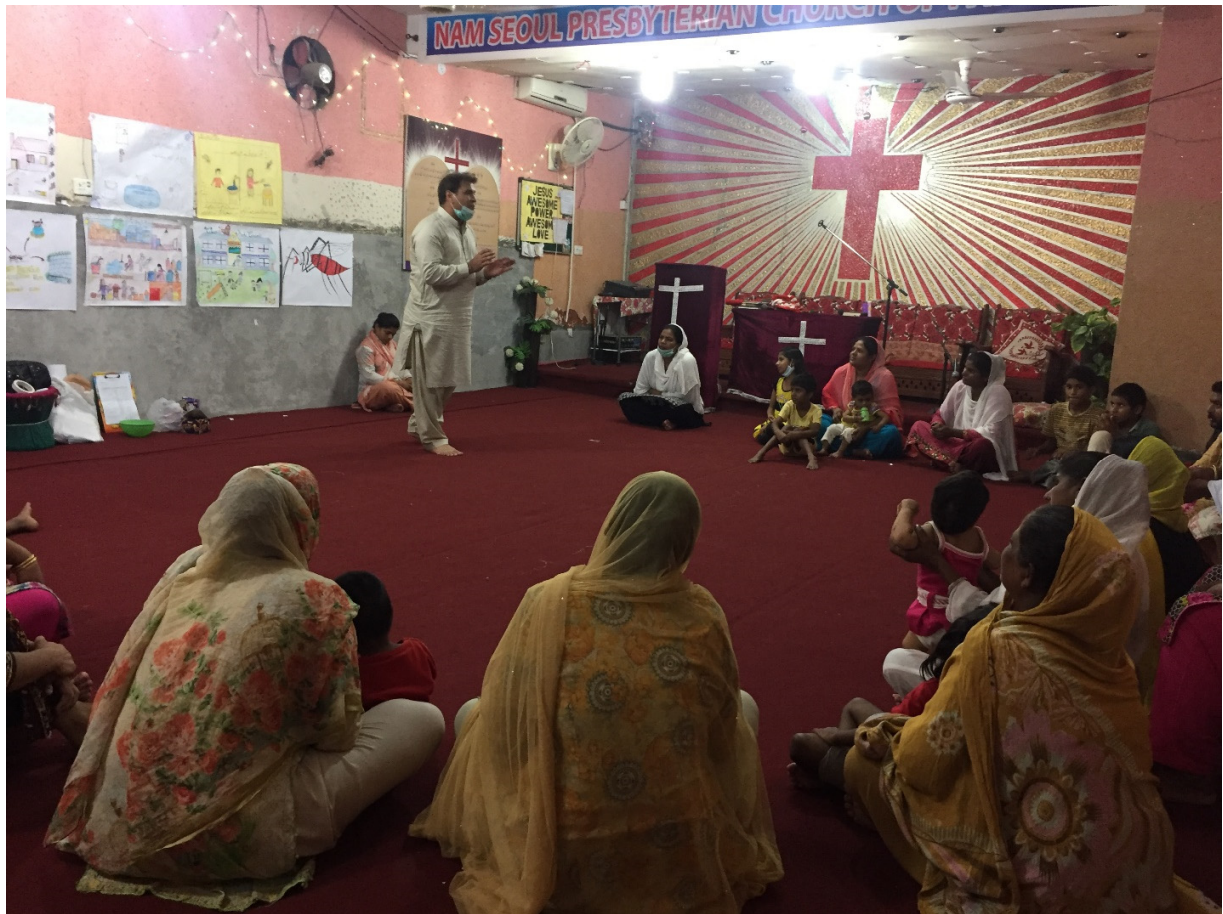

**Figure S3.** PD health education session with female community members.

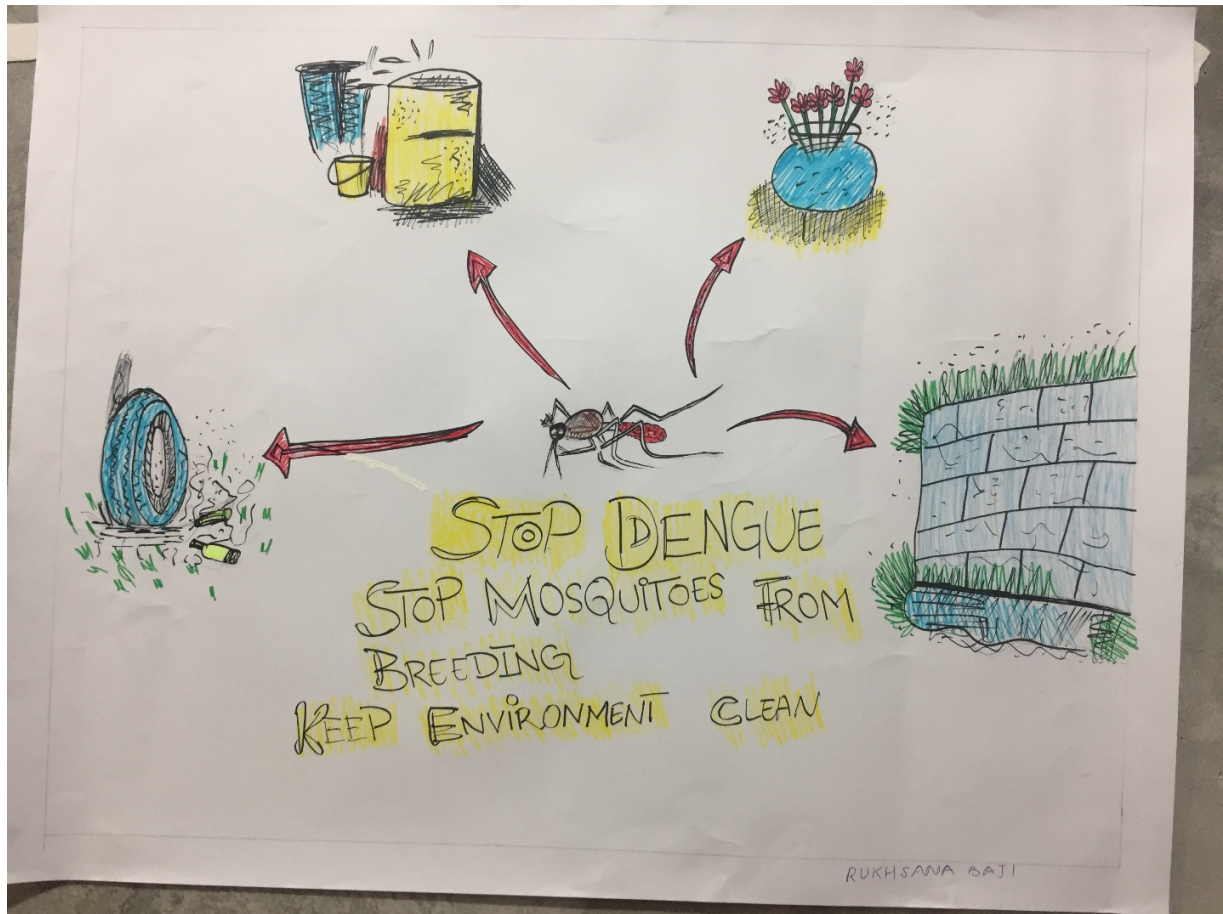

**Figure S4.** An illustration made by a community member for the sketch competition.
